# Supplementary material
Source: PubMed Central journal article supplement (PMC8891390)

## SUPPLEMENTAL MATERIAL

### Risk for Post-Colonoscopy Irritable Bowel Syndrome in Patients with and without Antibiotic Exposure: A Retrospective Cohort Study

Ravy K. Vajravelu\*, Jordan M. Shapiro\*, Josephine Ni, Shivani U. Thanawala, James D. Lewis, and Hashem B. El-Serag

| CONTENTS                                                                                                                         | PAGE |
|----------------------------------------------------------------------------------------------------------------------------------|------|
| <a href="#">Supplemental methods</a>                                                                                             | 2    |
| <a href="#">Supplemental table 1</a> . Administrative codes to identify primary IBS outcome                                      | 4    |
| <a href="#">Supplemental table 2</a> . American Hospital Formulary Service (AHFS) codes to identify IBS prescriptions            | 9    |
| <a href="#">Supplemental table 3</a> . Bowel preparation types                                                                   | 10   |
| <a href="#">Supplemental table 4</a> . Average number of claims (95% CI) for IBS and IBS symptoms after meeting outcome criteria | 11   |
| <a href="#">Supplemental table 5</a> . Administrative codes to identify exclusion diagnoses and procedures                       | 12   |
| <a href="#">Supplemental figure 1</a> . Study design diagram                                                                     | 15   |

## Supplemental methods

### Data source additional details

We chose 2005 as the study start year because it was one year after Optum first captured complete inpatient data. We used data from May 1, 2000 – December 31, 2004 to assess exclusion criteria. Medical diagnoses were identified using ICD codes in any encounter. ICD-9 was used prior to October 1, 2015, and ICD-10 was used thereafter. General equivalence mappings from the United States Agency for Healthcare Research and Quality's Healthcare Cost and Utilization Project were used to convert ICD-9 codes to ICD-10. Procedure and tests were identified by ICD, Current Procedural Terminology (CPT), and Healthcare Common Procedure Coding System (HCPCS) codes. Medication use was identified by National Drug Codes and classified into pharmacologic classes using American Hospital Formulary Service codes.

### Screening colonoscopy cohort exclusion criteria

Individuals with ICD medical claims for IBS any time before the index colonoscopy were excluded. Individuals with claims for abdominal pain, change in bowel habits, constipation, or diarrhea any time prior to the end of the exposure assessment window were also excluded as these may be symptoms of undiagnosed IBS. To exclude other causes of pre-existing abdominal pain, individuals with *Helicobacter pylori* infection, *Helicobacter pylori* testing (fecal antigen, serum antigen, breath test, or culture), diverticulitis, small intestinal bacterial overgrowth, or small intestinal bacterial overgrowth breath testing any time before colonoscopy were also excluded. To exclude pre-existing diarrhea, individuals with infectious diarrhea testing by stool culture, enteric pathogens polymerase chain reaction, stool ova and parasites, or *Clostridioides difficile* testing any time prior to colonoscopy were excluded (codes in **Supplemental table 5**). Additionally, individuals with prescriptions for IBS medications such as

alosetron, dicyclomine, diphenoxylate-atropine, eluxadoline, hyoscyamine, linaclotide, loperamide, lubiprostone, plecanatide, rifaximin, tricyclic antidepressants, or selective serotonin-reuptake inhibitors prior to colonoscopy were excluded (codes in **Supplemental table 2**). As antibiotics received during hospitalization are not recorded in Optum, individuals who were hospitalized 90 days or less before index colonoscopy were excluded to avoid potential exposure misclassification. All individuals in the cohort must have had at least 14 days of continuous follow-up after colonoscopy to allow for sufficient time for antibiotic exposure ascertainment.

**Supplemental table 1. Administrative codes to identify primary IBS outcome**

| <b>Code</b> | <b>Condition</b>     | <b>Code type</b> |
|-------------|----------------------|------------------|
| 5970        | Celiac disease       | ICD-9            |
| K900        | Celiac disease       | ICD-10           |
| 5771        | Chronic pancreatitis | ICD-9            |
| K861        | Chronic pancreatitis | ICD-10           |
| 1530        | Colorectal cancer    | ICD-9            |
| 1531        | Colorectal cancer    | ICD-9            |
| 1532        | Colorectal cancer    | ICD-9            |
| 1533        | Colorectal cancer    | ICD-9            |
| 1534        | Colorectal cancer    | ICD-9            |
| 1536        | Colorectal cancer    | ICD-9            |
| 1537        | Colorectal cancer    | ICD-9            |
| 1538        | Colorectal cancer    | ICD-9            |
| 1539        | Colorectal cancer    | ICD-9            |
| C180        | Colorectal cancer    | ICD-10           |
| C182        | Colorectal cancer    | ICD-10           |
| C183        | Colorectal cancer    | ICD-10           |
| C184        | Colorectal cancer    | ICD-10           |
| C185        | Colorectal cancer    | ICD-10           |
| C186        | Colorectal cancer    | ICD-10           |
| C187        | Colorectal cancer    | ICD-10           |
| C188        | Colorectal cancer    | ICD-10           |
| C189        | Colorectal cancer    | ICD-10           |
| Z85038      | Colorectal cancer    | ICD-10           |
| 1540        | Colorectal cancer    | ICD-9            |
| 1541        | Colorectal cancer    | ICD-9            |
| 1548        | Colorectal cancer    | ICD-9            |
| C19         | Colorectal cancer    | ICD-10           |
| C20         | Colorectal cancer    | ICD-10           |
| Z85048      | Colorectal cancer    | ICD-10           |
| 5500        | Crohn's disease      | ICD-9            |
| 5551        | Crohn's disease      | ICD-9            |
| 5552        | Crohn's disease      | ICD-9            |
| 5559        | Crohn's disease      | ICD-9            |

|          |                          |        |
|----------|--------------------------|--------|
| K5000    | Crohn's disease          | ICD-10 |
| K50011   | Crohn's disease          | ICD-10 |
| K50012   | Crohn's disease          | ICD-10 |
| K50013   | Crohn's disease          | ICD-10 |
| K50014   | Crohn's disease          | ICD-10 |
| K50018   | Crohn's disease          | ICD-10 |
| K50019   | Crohn's disease          | ICD-10 |
| K5010    | Crohn's disease          | ICD-10 |
| K50111   | Crohn's disease          | ICD-10 |
| K50112   | Crohn's disease          | ICD-10 |
| K50113   | Crohn's disease          | ICD-10 |
| K50114   | Crohn's disease          | ICD-10 |
| K50118   | Crohn's disease          | ICD-10 |
| K50119   | Crohn's disease          | ICD-10 |
| K5080    | Crohn's disease          | ICD-10 |
| K50811   | Crohn's disease          | ICD-10 |
| K50812   | Crohn's disease          | ICD-10 |
| K50813   | Crohn's disease          | ICD-10 |
| K50814   | Crohn's disease          | ICD-10 |
| K50818   | Crohn's disease          | ICD-10 |
| K50819   | Crohn's disease          | ICD-10 |
| K5090    | Crohn's disease          | ICD-10 |
| K50911   | Crohn's disease          | ICD-10 |
| K50912   | Crohn's disease          | ICD-10 |
| K50913   | Crohn's disease          | ICD-10 |
| K50914   | Crohn's disease          | ICD-10 |
| K50918   | Crohn's disease          | ICD-10 |
| K50919   | Crohn's disease          | ICD-10 |
| 56360000 | Five amino-salicylates   | AHFS   |
| 5641     | Irritable bowel syndrome | ICD-9  |
| K580     | Irritable bowel syndrome | ICD-10 |
| K581     | Irritable bowel syndrome | ICD-10 |
| K582     | Irritable bowel syndrome | ICD-10 |
| K588     | Irritable bowel syndrome | ICD-10 |
| K589     | Irritable bowel syndrome | ICD-10 |
| 5712     | Liver cirrhosis          | ICD-9  |

|        |                     |        |
|--------|---------------------|--------|
| 5715   | Liver cirrhosis     | ICD-9  |
| 5716   | Liver cirrhosis     | ICD-9  |
| K7030  | Liver cirrhosis     | ICD-10 |
| K740   | Liver cirrhosis     | ICD-10 |
| K7460  | Liver cirrhosis     | ICD-10 |
| K7469  | Liver cirrhosis     | ICD-10 |
| K743   | Liver cirrhosis     | ICD-10 |
| K744   | Liver cirrhosis     | ICD-10 |
| K745   | Liver cirrhosis     | ICD-10 |
| 5791   | Malabsorption       | ICD-9  |
| 5792   | Malabsorption       | ICD-9  |
| 5793   | Malabsorption       | ICD-9  |
| 5794   | Malabsorption       | ICD-9  |
| 5798   | Malabsorption       | ICD-9  |
| 5799   | Malabsorption       | ICD-9  |
| K901   | Malabsorption       | ICD-10 |
| K902   | Malabsorption       | ICD-10 |
| K912   | Malabsorption       | ICD-10 |
| K903   | Malabsorption       | ICD-10 |
| K9041  | Malabsorption       | ICD-10 |
| K9049  | Malabsorption       | ICD-10 |
| K9089  | Malabsorption       | ICD-10 |
| K909   | Malabsorption       | ICD-10 |
| 5589   | Microscopic colitis | ICD-9  |
| K52831 | Microscopic colitis | ICD-10 |
| K52832 | Microscopic colitis | ICD-10 |
| K52838 | Microscopic colitis | ICD-10 |
| K52839 | Microscopic colitis | ICD-10 |
| K5289  | Microscopic colitis | ICD-10 |
| K529   | Microscopic colitis | ICD-10 |
| 1830   | Ovarian cancer      | ICD-9  |
| C569   | Ovarian cancer      | ICD-10 |
| 1986   | Ovarian cancer      | ICD-9  |
| C7960  | Ovarian cancer      | ICD-10 |
| 1570   | Pancreatic cancer   | ICD-9  |
| 1571   | Pancreatic cancer   | ICD-9  |

|        |                    |        |
|--------|--------------------|--------|
| 1572   | Pancreatic cancer  | ICD-9  |
| 1573   | Pancreatic cancer  | ICD-9  |
| 1574   | Pancreatic cancer  | ICD-9  |
| 1578   | Pancreatic cancer  | ICD-9  |
| 1579   | Pancreatic cancer  | ICD-9  |
| C250   | Pancreatic cancer  | ICD-10 |
| C251   | Pancreatic cancer  | ICD-10 |
| C252   | Pancreatic cancer  | ICD-10 |
| C253   | Pancreatic cancer  | ICD-10 |
| C254   | Pancreatic cancer  | ICD-10 |
| C257   | Pancreatic cancer  | ICD-10 |
| C258   | Pancreatic cancer  | ICD-10 |
| C259   | Pancreatic cancer  | ICD-10 |
| 5560   | Ulcerative colitis | ICD-9  |
| 5561   | Ulcerative colitis | ICD-9  |
| 5562   | Ulcerative colitis | ICD-9  |
| 5563   | Ulcerative colitis | ICD-9  |
| 5564   | Ulcerative colitis | ICD-9  |
| 5565   | Ulcerative colitis | ICD-9  |
| 5566   | Ulcerative colitis | ICD-9  |
| 5568   | Ulcerative colitis | ICD-9  |
| 5569   | Ulcerative colitis | ICD-9  |
| K5100  | Ulcerative colitis | ICD-10 |
| K51011 | Ulcerative colitis | ICD-10 |
| K51012 | Ulcerative colitis | ICD-10 |
| K51013 | Ulcerative colitis | ICD-10 |
| K51014 | Ulcerative colitis | ICD-10 |
| K51018 | Ulcerative colitis | ICD-10 |
| K51019 | Ulcerative colitis | ICD-10 |
| K5120  | Ulcerative colitis | ICD-10 |
| K51211 | Ulcerative colitis | ICD-10 |
| K51212 | Ulcerative colitis | ICD-10 |
| K51213 | Ulcerative colitis | ICD-10 |
| K51214 | Ulcerative colitis | ICD-10 |
| K51218 | Ulcerative colitis | ICD-10 |
| K51219 | Ulcerative colitis | ICD-10 |

|        |                    |        |
|--------|--------------------|--------|
| K5130  | Ulcerative colitis | ICD-10 |
| K51311 | Ulcerative colitis | ICD-10 |
| K51312 | Ulcerative colitis | ICD-10 |
| K51313 | Ulcerative colitis | ICD-10 |
| K51314 | Ulcerative colitis | ICD-10 |
| K51318 | Ulcerative colitis | ICD-10 |
| K51319 | Ulcerative colitis | ICD-10 |
| K5140  | Ulcerative colitis | ICD-10 |
| K51411 | Ulcerative colitis | ICD-10 |
| K51412 | Ulcerative colitis | ICD-10 |
| K51413 | Ulcerative colitis | ICD-10 |
| K51414 | Ulcerative colitis | ICD-10 |
| K51418 | Ulcerative colitis | ICD-10 |
| K51419 | Ulcerative colitis | ICD-10 |
| K5150  | Ulcerative colitis | ICD-10 |
| K51511 | Ulcerative colitis | ICD-10 |
| K51512 | Ulcerative colitis | ICD-10 |
| K51513 | Ulcerative colitis | ICD-10 |
| K51514 | Ulcerative colitis | ICD-10 |
| K51518 | Ulcerative colitis | ICD-10 |
| K51519 | Ulcerative colitis | ICD-10 |
| K5180  | Ulcerative colitis | ICD-10 |
| K51811 | Ulcerative colitis | ICD-10 |
| K51812 | Ulcerative colitis | ICD-10 |
| K51813 | Ulcerative colitis | ICD-10 |
| K51814 | Ulcerative colitis | ICD-10 |
| K51818 | Ulcerative colitis | ICD-10 |
| K51819 | Ulcerative colitis | ICD-10 |
| K5190  | Ulcerative colitis | ICD-10 |
| K51911 | Ulcerative colitis | ICD-10 |
| K51912 | Ulcerative colitis | ICD-10 |
| K51913 | Ulcerative colitis | ICD-10 |
| K51914 | Ulcerative colitis | ICD-10 |
| K51918 | Ulcerative colitis | ICD-10 |
| K51919 | Ulcerative colitis | ICD-10 |



**Supplemental table 2. American Hospital Formulary Service (AHFS) codes to identify IBS prescriptions**

| <b>AHFS code</b> | <b>AHFS class</b>                        | <b>Examples</b>                    |
|------------------|------------------------------------------|------------------------------------|
| 56080000         | Antidiarrhea agents                      | Diphenoxylate-atropine, loperamide |
| 12080800         | Antimuscarinics/antispasmodics           | Dicyclomine, hyoscyamine           |
| 56120000         | Cathartics and laxatives                 | Lubiprostone                       |
| 56360000         | Anti-inflammatory agents                 | Alosetron                          |
| 56920000         | Miscellaneous GI drugs                   | Eluxadoline, linaclotide           |
| 8122830          | Rifamycins                               | Rifaxamin                          |
| 28160420         | Selective-serotonin reuptake inhibitors* |                                    |
| 28160428         | Tricyclic antidepressants*               |                                    |

Note: \* Used for exclusion criteria only. These were not considered for the composite outcome of IBS, IBS medications, or IBS symptoms.

**Supplemental table 3. Bowel preparation types**

| <b>Category</b>                        | <b>Example brand names</b>                                                   |
|----------------------------------------|------------------------------------------------------------------------------|
| Polyethylene glycol containing         | Miralax, GoLytely, NuLytely, Colyte, Gavilyte, Trilyte, Moviprep, Halflytely |
| Magnesium citrate                      | Citroma                                                                      |
| Sodium phosphate                       | Osmoprep                                                                     |
| Sodium sulfate                         | Suprep, Prepopik                                                             |
| Polyethylene glycol and sodium sulfate | Suclear                                                                      |

**Supplemental table 4. Average number of claims (95% CI) for IBS and IBS symptoms after meeting outcome criteria**

|                   |                          | IBS                | Abdominal pain     | Change in bowel habits | Constipation       | Diarrhea           | Days from outcome to last IBS/IBS symptom claim |
|-------------------|--------------------------|--------------------|--------------------|------------------------|--------------------|--------------------|-------------------------------------------------|
| IBS               | No antibiotics (n = 151) | 1.8<br>(1.2 - 2.3) | 1.8<br>(1.3 - 2.3) | 0.1<br>(0.0 - 0.2)     | 0.5<br>(0.2 - 0.7) | 0.4<br>(0.2 - 0.7) | 930.2<br>(734.5 - 1125.9)                       |
|                   | Antibiotics (n = 166)    | 1.3<br>(0.9 - 1.7) | 1.9<br>(1.3 - 2.6) | 0.1<br>(0.0 - 0.2)     | 0.2<br>(0.1 - 0.4) | 0.5<br>(0.2 - 0.7) | 903.1<br>(706.7 - 1099.5)                       |
| Composite outcome | No antibiotics (n = 754) | 0.5<br>(0.3 - 0.6) | 2.7<br>(2.4 - 3.0) | 0.1<br>(0.1 - 0.1)     | 0.5<br>(0.4 - 0.6) | 0.9<br>(0.7 - 1.1) | 822.5<br>(737.1 - 907.9)                        |
|                   | Antibiotics (n = 834)    | 0.4<br>(0.3 - 0.5) | 3.0<br>(2.2 - 3.9) | 0.2<br>(0.1 - 0.2)     | 0.5<br>(0.3 - 0.6) | 1.0<br>(0.8 - 1.2) | 963.7<br>(874.9 - 1052.5)                       |

**Supplemental table 5. Administrative codes to identify exclusion diagnoses and procedures**

| <b>Code</b> | <b>Condition</b>       | <b>Code type</b> |
|-------------|------------------------|------------------|
| 78900       | Abdominal pain         | ICD-9            |
| 78901       | Abdominal pain         | ICD-9            |
| 78902       | Abdominal pain         | ICD-9            |
| 78903       | Abdominal pain         | ICD-9            |
| 78904       | Abdominal pain         | ICD-9            |
| 78905       | Abdominal pain         | ICD-9            |
| 78906       | Abdominal pain         | ICD-9            |
| 78907       | Abdominal pain         | ICD-9            |
| 78909       | Abdominal pain         | ICD-9            |
| R1010       | Abdominal pain         | ICD-10           |
| R1011       | Abdominal pain         | ICD-10           |
| R1012       | Abdominal pain         | ICD-10           |
| R1013       | Abdominal pain         | ICD-10           |
| R1030       | Abdominal pain         | ICD-10           |
| R1031       | Abdominal pain         | ICD-10           |
| R1032       | Abdominal pain         | ICD-10           |
| R1033       | Abdominal pain         | ICD-10           |
| R1084       | Abdominal pain         | ICD-10           |
| R109        | Abdominal pain         | ICD-10           |
| 87493       | C difficile testing    | CPT              |
| 87230       | C difficile testing    | CPT              |
| 87324       | C difficile testing    | CPT              |
| 78799       | Change in bowel habits | ICD-9            |
| R194        | Change in bowel habits | ICD-10           |
| 56400       | Constipation           | ICD-9            |
| 56401       | Constipation           | ICD-9            |
| 56402       | Constipation           | ICD-9            |
| 56409       | Constipation           | ICD-9            |
| K5900       | Constipation           | ICD-10           |
| K5901       | Constipation           | ICD-10           |
| K5902       | Constipation           | ICD-10           |
| K5903       | Constipation           | ICD-10           |
| K5904       | Constipation           | ICD-10           |
| K5909       | Constipation           | ICD-10           |
| 5645        | Diarrhea               | ICD-9            |
| 0092        | Diarrhea               | ICD-9            |
| 0093        | Diarrhea               | ICD-9            |

|       |                                       |        |
|-------|---------------------------------------|--------|
| 78791 | Diarrhea                              | ICD-9  |
| K591  | Diarrhea                              | ICD-10 |
| A09   | Diarrhea                              | ICD-10 |
| R197  | Diarrhea                              | ICD-10 |
| 56211 | Diverticulitis                        | ICD-9  |
| 56213 | Diverticulitis                        | ICD-9  |
| K5720 | Diverticulitis                        | ICD-10 |
| K5721 | Diverticulitis                        | ICD-10 |
| K5730 | Diverticulitis                        | ICD-10 |
| K5731 | Diverticulitis                        | ICD-10 |
| K5732 | Diverticulitis                        | ICD-10 |
| K5733 | Diverticulitis                        | ICD-10 |
| K5740 | Diverticulitis                        | ICD-10 |
| K5741 | Diverticulitis                        | ICD-10 |
| K5750 | Diverticulitis                        | ICD-10 |
| K5751 | Diverticulitis                        | ICD-10 |
| K5752 | Diverticulitis                        | ICD-10 |
| K5753 | Diverticulitis                        | ICD-10 |
| K5780 | Diverticulitis                        | ICD-10 |
| K5781 | Diverticulitis                        | ICD-10 |
| K5790 | Diverticulitis                        | ICD-10 |
| K5791 | Diverticulitis                        | ICD-10 |
| K5792 | Diverticulitis                        | ICD-10 |
| K5793 | Diverticulitis                        | ICD-10 |
| 4186  | H pylori                              | ICD-9  |
| B9681 | H pylori                              | ICD-10 |
| 83013 | H pylori breath test                  | CPT    |
| 83014 | H pylori breath test                  | CPT    |
| 87081 | H pylori culture                      | CPT    |
| 87205 | H pylori culture                      | CPT    |
| 86677 | H pylori serum antigen                | CPT    |
| 87338 | H pylori stool antigen                | CPT    |
| 91065 | Hydrogen breath test                  | CPT    |
| 5641  | Irritable bowel syndrome              | ICD-9  |
| K580  | Irritable bowel syndrome              | ICD-10 |
| K581  | Irritable bowel syndrome              | ICD-10 |
| K582  | Irritable bowel syndrome              | ICD-10 |
| K588  | Irritable bowel syndrome              | ICD-10 |
| K589  | Irritable bowel syndrome              | ICD-10 |
| 849   | Small intestinal bacterial overgrowth | ICD-9  |

|       |                                       |        |
|-------|---------------------------------------|--------|
| A048  | Small intestinal bacterial overgrowth | ICD-10 |
| A049  | Small intestinal bacterial overgrowth | ICD-10 |
| 87045 | Stool culture                         | CPT    |
| 87046 | Stool culture                         | CPT    |
| 87427 | Stool culture                         | CPT    |
| 87177 | Stool ova and parasite                | CPT    |
| 87209 | Stool ova and parasite                | CPT    |
| 87015 | Stool ova and parasite                | CPT    |
| 87206 | Stool ova and parasite                | CPT    |
| 87329 | Stool ova and parasite                | CPT    |
| 87169 | Stool ova and parasite                | CPT    |

Supplemental figure 1. Study design diagram

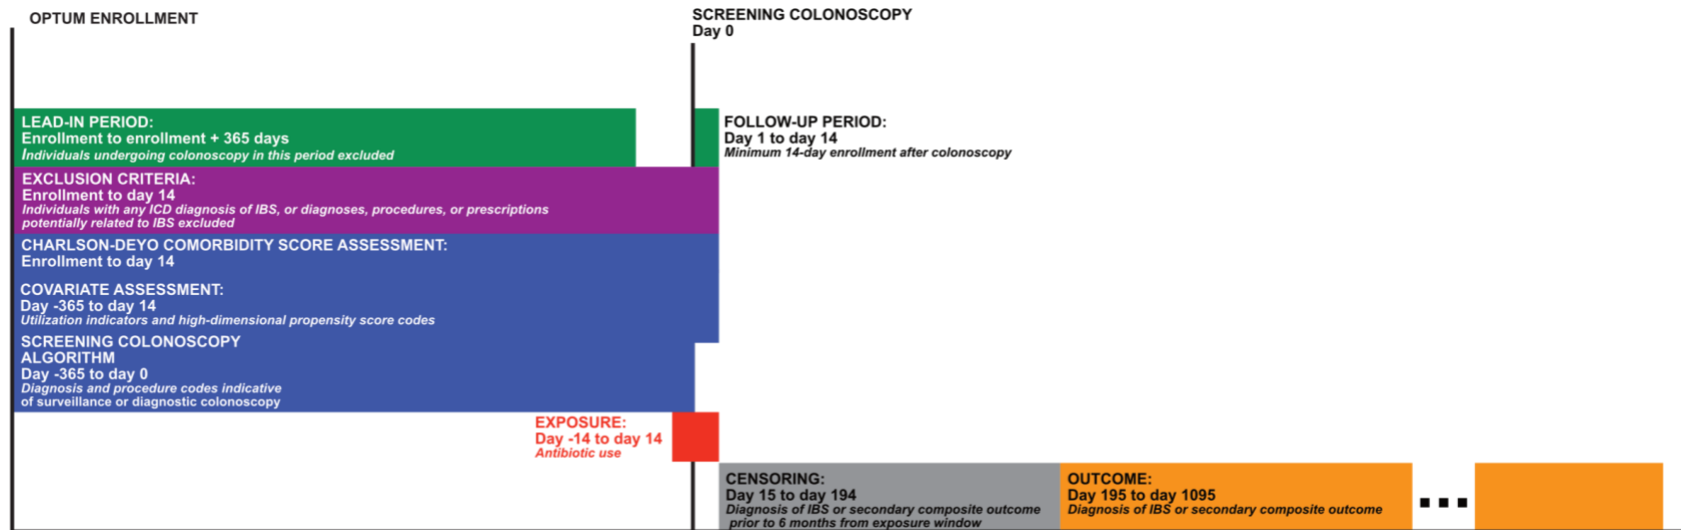

Supplement: NIHMS1738004-supplement-Supp_Materials.pdf [file NIHMS1738004-supplement-Supp_Materials.pdf]
